**1 Understanding and addressing challenges for Advance Care Planning in the COVID-19**  
**2 pandemic: An analysis of the UK CovPall survey data from specialist palliative care services.**

**3 Bradshaw, A\*<sup>1</sup>, Dunleavy, L.,<sup>2</sup> Walshe, C.,<sup>2</sup> Preston, N.,<sup>2</sup> Cripps, R.,<sup>3</sup> Hocaoglu, M.B.,<sup>3</sup> Bajwah, S.,**  
**4 <sup>3</sup> Maddocks, M.,<sup>3</sup> Oluyase, A.,<sup>3</sup> Sleeman, K.E.,<sup>3</sup> Higginson, I.J.,<sup>3</sup> Fraser, L.K.,<sup>4</sup> Murtagh, F.E.M<sup>1</sup>. On**  
**5 behalf of the CovPall study team**  
**6**

**7 <sup>1</sup> Wolfson Palliative Care Research Centre, Hull York Medical School, University of Hull, Hull, UK**

**8 <sup>2</sup> International Observatory on End of Life Care, Lancaster University, Lancaster, UK**

**9 <sup>3</sup> Cicely Saunders Institute of Palliative Care, Policy & Rehabilitation, King's College London,**  
**10 London, UK**

**11 <sup>4</sup> Martin House Research Centre, Department of Health Sciences, University of York, York, UK**

**12**

**13**

**14**

**15**

**16**

**17**

**18**

**19**

**20**

**21**

**22**

**23**

**24**

25 **Abstract**

26  
27 **Background:** During the COVID-19 pandemic, specialist palliative care services have an important  
28 role to play conducting high-quality and individualised Advance Care Planning discussions. Little is  
29 known about the challenges to Advance Care Planning in this context, or the changes services have  
30 made in adapting to them.

31 **Aim:** To describe the challenges experienced, and changes made to support, Advance Care Planning  
32 at the height of the COVID-19 pandemic.

33 **Design:** Cross-sectional on-line survey of UK palliative and hospice services' response to COVID-19.  
34 Closed-ended responses are reported descriptively. Open-ended responses were analysed using a  
35 thematic Framework approach.

36 **Respondents:** 277 UK palliative and hospice care services.

37 **Results:** 37.9% of services provided more Advance Care Planning directly. 58.5% provided more  
38 support to others. Some challenges to Advance Care Planning pre-dated the pandemic, whilst other  
39 were COVID-19 specific or exacerbated by COVID-19. Six themes demonstrated challenges at  
40 different levels of the Social Ecological Model, including: complex decision making in the face of a  
41 new disease; maintaining a personalised approach; COVID-specific communication difficulties;  
42 workload and pressure; sharing information; and national context of fear and uncertainty. Two themes  
43 demonstrate changes made to support Advance Care Planning, including: adapting local processes and  
44 adapting local structures.

45 **Conclusions:** Professionals and healthcare providers need to ensure Advance Care Planning is  
46 individualised by tailoring it to the values, priorities, and ethnic, cultural, and religious context of each  
47 person. Policymakers need to consider carefully how high-quality, person-centred Advance Care  
48 Planning can be resourced as a part of standard healthcare ahead of future pandemic waves.

49 **Key words:** Palliative care, Hospices, Coronavirus, Surveys and Questionnaires, Pandemics, Advance  
50 Care Planning.

51

## 52     **Key Statements**

### 53     **What is already known about the topic?**

- 54         -     An important part of palliative care's response to COVID-19 is ensuring that Advance Care
- 55             Planning discussions occur with patients and their care networks
- 56         -     High quality Advance Care Planning is viewed as a process that adopts a holistic,
- 57             collaborative, and individualised approach
- 58         -     Prior to COVID-19, challenges to Advance Care Planning included time constraints, lack of
- 59             training, fears of taking away hope, limited resources, and insufficient knowledge

### 60     **What this paper adds?**

- 61         -     The COVID-19 pandemic exacerbated already-existing challenges to conducting high-quality,
- 62             individualised Advance Care Planning, including the ability to maintain a personalised
- 63             approach and sharing information between services
- 64         -     COVID-specific challenges to Advance Care Planning exist, including the complexities of
- 65             decision-making for a novel disease, communication issues, and workload pressures
- 66         -     In responding to these challenges, services adapted local processes (prioritising specific
- 67             components, normalisation and integration into everyday practice) and structures (using
- 68             technology, shifting resources, collaboration) of care

### 69     **Implications for practice, theory or policy**

- 70         -     COVID-19 has provided an opportunity to re-think Advance Care Planning in which the
- 71             starting point to any discussion is always the values and priorities of patients themselves
- 72         -     Providers and policymakers need to urgently consider how high-quality Advance Care
- 73             Planning can be resourced and normalised as a part of standard care across the health sector,
- 74             ahead of future or recurrent pandemic waves and in routine care more generally
- 75         -     We provide questions for health professionals, services, and policy makers to consider in
- 76             working towards this

## 77 **Introduction**

78

79 In March 2020, the World Health Organisation declared Coronavirus (COVID-19) a global pandemic,  
80 with an estimated global mortality rate of 3.4%, increasing with age and co-morbidities.<sup>(1)</sup> The  
81 number of patients suffering and dying from COVID-19-related illness is placing huge pressure on  
82 healthcare systems across the world.<sup>(2)</sup> To date, there have been 29,155,581 confirmed cases and  
83 926,544 deaths attributable to COVID-19.<sup>(3)</sup>

84 Worldwide, specialist palliative care services have an important role to play in responding to the  
85 pandemic and are skilled in delivering person-centred symptom control and making complex  
86 decisions in the face of uncertainty.<sup>(2, 4, 5)</sup> One crucial aspect of decision making in palliative care -  
87 and even more so within the context of the pandemic - is ensuring that Advance Care Planning (ACP)  
88 discussions occur with patients (and their families).

89 Adapting existing person-centred definitions<sup>(6, 7)</sup>, we define high quality ACP as ‘considerations and  
90 activities to best prepare for future care, including: identifying values based on past experiences and  
91 quality of life; choosing proxy decision-makers wisely and verifying that they understand their role;  
92 deciding whether to grant leeway (and how much) in proxy decision making, and; informing other  
93 family of wishes in advance to reduce or prevent conflict’. As a person’s preferences and priorities are  
94 complex and may change over time,<sup>(8, 9)</sup> we view ACP as a process, not a one-time event or  
95 document.<sup>(10)</sup> In the COVID-19 pandemic, it is crucial that healthcare professionals have high quality  
96 and timely ACP discussions with patients and their families, to enhance the likelihood of improved  
97 outcomes and satisfaction.<sup>(11-13)</sup> However, this presents multiple challenges.

98 Patient (unpredictable disease/prognosis, insufficient knowledge of health status, anxiety, and denial),  
99 <sup>(13, 14)</sup> professional (time constraints, lack of communication training/skills, fears of taking away hope),  
100 <sup>(13-15)</sup> and system-wide (limited resources and unclear responsibilities)<sup>(14-16)</sup> challenges exist to  
101 initiating and following-up ACP discussions. Currently, however, there is lack of evidence regarding  
102 how these issues manifest during the COVID-19 pandemic, or what may be done to address these  
103 challenges. Addressing these issues is crucial in optimising the specialist palliative care response to  
104 the COVID-19 pandemic and for adapting to future increases in the need for palliative care.<sup>(17, 18)</sup>

This study aims to describe the challenges that UK palliative care services experienced regarding ACP at the height of the COVID-19 pandemic and the changes made to support ACP.

## **Methodology and Methods**

### *Design and participants*

The CovPall study is a rapid multinational observational study of palliative care during COVID-19. This paper reports the cross-sectional on-line survey of hospice and specialist palliative services in the UK given that understandings of ACP during COVID-19 are dependent on the cultural and policy contexts in which they are conducted. Services providing hospice and specialist palliative care across inpatient palliative care, hospital palliative care, home palliative care, and home nursing settings were eligible for participation and recruited through palliative care and hospice organisations (Sue Ryder, Hospice UK, Marie Curie, European Association of Palliative Care, Together for Short Lives, and the palliativedrugs.com and www.pos-pal.org network) between April and July 2020. We invited service leads to complete the survey online with the aim of receiving responses from all hospice and specialist palliative care services.

Ethical approval was obtained from King's College London Research Ethics committee (LRS-19/20-18541). The CovPall protocol is registered (ISRCTN16561225) and is reported according to STROBE<sup>(19)</sup> and CHERRIES checklists.<sup>(20)</sup>

### *Survey and data collection*

REDCap was used to securely build and host the survey which aimed to understand how palliative care services responded to the COVID-19 pandemic, and comprised of closed- and free-text responses (full survey in supplementary file 1 and procedures for survey are provided in supplementary file 2). This paper focuses on the impact of COVID-19 on ACP via analyses of two closed-ended and two free-text questions (see Table 1).

Table 1: Closed and free-text survey questions analysed in this study

|                         |                                                                                                                                                                                                                                    |                                                                                                                   |
|-------------------------|------------------------------------------------------------------------------------------------------------------------------------------------------------------------------------------------------------------------------------|-------------------------------------------------------------------------------------------------------------------|
| <b>Closed questions</b> | <p>4.13. Would you say you are now involved directly with patients/families in advance care planning?</p> <p>4.14. Would you say you are now involved advising/supporting others and/or educating about advance care planning?</p> | <p>1. A lot more</p> <p>2. Slightly more</p> <p>3. About the same</p> <p>4. Slightly less</p> <p>5. Much less</p> |
| <b>Open questions</b>   | <p>4.15. In what ways (if any) have you changed how you are supporting advance care planning?</p> <p>4.16. What would you say are the main challenges for advance care planning during the COVID-19 pandemic?</p>                  | Free text response                                                                                                |

### Data analysis

Anonymised quantitative data items were summarised descriptively. Free text responses were analysed in NVivo (v12) using a thematic Framework approach.<sup>(21)</sup> This allowed within- and between- case analyses to be made to explore how key contextual variables related to main themes. The following iterative steps were followed: (1) familiarisation and coding; (2) developing an analytic framework; (3) indexing; (4) charting (by developing matrices to understand differences in main themes across key variables); and (5) interpreting the data. During the development of our analytic framework, we recognised that responses to the challenges to ACP free-text question could be understood through using an adapted version of the Social Ecological Model.<sup>(22, 23)</sup> This model recognises that challenges to ACP exist at multiple interacting levels (individual, interpersonal, within teams/services, between teams/services, and national).

We adopted a relativist approach to rigour<sup>(24)</sup> by using lists of criteria on what researchers agree constitutes high quality qualitative analysis<sup>(25-27)</sup> as a starting point and then selecting criteria appropriate to the context, purposes, and methodology of this study (table 2).

151 Table 2: List of quality criteria selected for ensuring a rigorous qualitative analysis and how it was fulfilled in this study

| Quality criteria                                                                                                     | How it was fulfilled                                                                                                                                                                                                                                                                                                                                                                                                                                         |
|----------------------------------------------------------------------------------------------------------------------|--------------------------------------------------------------------------------------------------------------------------------------------------------------------------------------------------------------------------------------------------------------------------------------------------------------------------------------------------------------------------------------------------------------------------------------------------------------|
| <b>Rich rigor</b> (does the analysis use appropriate theoretical constructs, data, sample, and context?)             | We collected and analysed free text responses from 277 palliative care services (~84% in the UK), drawing on the Social Ecological Model to understand and explain the individual, organisational/structural, and national challenges to conducting ACP during the COVID-19 pandemic within a UK context.                                                                                                                                                    |
| <b>Credibility</b> (have thick descriptions and detailed findings been provided?)                                    | A wealth of free-text data allowed for thick description and detail that shows the reader the challenges and changes made to support ACP during the COVID-19 pandemic. Quotes and their descriptions are provided to support this.                                                                                                                                                                                                                           |
| <b>Width</b> (how comprehensive is the evidence provided?)                                                           | Data was collected across all regions of the UK at the height of the pandemic, thus presenting a diversity of voices and perspectives (see Table 3 for demographic information of participating services).                                                                                                                                                                                                                                                   |
| <b>Exploiting exceptional data</b> (were contradictory data attended to during analysis?)                            | During analysis, data that contradicted or questioned the narratives of main themes were attended to and incorporated into the development of themes.                                                                                                                                                                                                                                                                                                        |
| <b>Sincerity</b> (did the research team engage in reflexivity and were they transparent about the research process?) | Each step of the analytic process is outlined clearly. During analysis, the research team offered critical and alternative interpretations/explanations of findings, challenged each other's assumptions, and encouraged introspective (e.g., how each researcher's biases, experiences, and histories impacted the analytic process) and intersubjective (e.g., how interactions between the research team members affected analysis) forms of reflexivity. |
| <b>Meaningful coherence</b> (does the analysis achieves its intended goals through using appropriate methods?)       | We used thematic Framework analysis to understand the research aims and, in the discussion, contextualise research findings in relation to previous literature regarding ACP during COVID-19 and palliative care more generally.                                                                                                                                                                                                                             |

Table 3: Demographic information of participating palliative care services and an overview of UK participants' responses to closed-ended CovPall survey questions on Advance Care Planning.

|                                  | Number                       | %        |
|----------------------------------|------------------------------|----------|
| <b>Total Responses</b>           |                              |          |
|                                  | 277                          | 100      |
| <b>Countries</b>                 |                              |          |
| England                          | 225                          | 81.2     |
| Scotland                         | 33                           | 11.9     |
| Wales                            | 15                           | 5.4      |
| Northern Ireland                 | 4                            | 1.4      |
| <b>Patients</b>                  |                              |          |
| Adult only                       | 247                          | 89.2     |
| Children only                    | 16                           | 5.7      |
| Both                             | 11                           | 4.0      |
| Missing                          | 3                            | 1.1      |
| <b>Setting</b>                   |                              |          |
| Inpatient palliative care unit   | 168                          | 63.0     |
| Hospital palliative care team    | 135                          | 49.6     |
| Home palliative care team        | 160                          | 59.1     |
| Home nursing                     | 92                           | 32.7     |
| <b>Type of Management</b>        |                              |          |
| Charitable/non profit            | 143                          | 51.6     |
| Public                           | 103                          | 37.2     |
| Private/Other                    | 16                           | 5.4      |
| Missing                          | 15                           | 5.4      |
| <b>Advance Care Planning</b>     | <b>Number of Respondents</b> | <b>%</b> |
| <b>Directly providing ACP</b>    |                              |          |
| A lot more                       | 28                           | 10.1     |
| Slightly more                    | 77                           | 27.8     |
| About the same                   | 134                          | 48.4     |
| Slightly less                    | 13                           | 4.7      |
| Much less                        | 10                           | 3.6      |
| Missing                          | 15                           | 5.4      |
| <b>Advising others about ACP</b> |                              | <b>%</b> |
| A lot more                       | 76                           | 27.4     |
| Slightly more                    | 86                           | 31.1     |
| About the same                   | 80                           | 28.9     |
| Slightly less                    | 12                           | 4.3      |
| Much less                        | 8                            | 2.9      |
| Missing                          | 15                           | 5.4      |

Note: information on settings is not mutually exclusive; many responding services delivered palliative care across multiple settings



## Findings

### *Characteristics of survey sample and ACP provision*

277 UK palliative care services responded (see Table 3). 248 services reported caring for patients with suspected or confirmed COVID-19, and 16 services reported no suspected or confirmed cases of COVID patients (13 missing data). The number of COVID-19 patients seen ranged from 0-400, (median 14; IQR 5-52). 37.9% of responding services were directly providing more ACP and 58.5% were providing more advice to others about ACP. The vast majority (92.4%) of those who were providing more direct ACP were also providing more advice to others about the ACP process.

### *Free text responses*

## Section 1: Challenges to ACP

Six themes and two sub-themes represent the challenges to ACP and how these were understood through the different levels of the Social Ecological Model. Whilst some of these challenges were specific to COVID-19, others were general challenges exacerbated by the pandemic (see Figure 1).

## National Level

### Theme 1: A national context of fear and uncertainty

ACP discussions were challenging because they took place in a national context of fear and uncertainty. Fears across society – alongside national policies on social/physical distancing – provided a contextual backdrop through which challenges at other levels of the Social Ecological Model may be understood.

A major source of fear and uncertainty was that many patients, their families, and healthcare professionals perceived that clinical decisions were being made on the basis of limited resources, rationing of treatments and services, and the government policy to ‘protect the NHS’. There was particular concern that people who were older, had comorbidities, were disabled, or from Black, Asian and Minority Ethnic backgrounds were more likely to be discriminated through the adoption of a blanket– as opposed to a person-centred - approach to decision-making:

*‘Perception in public that [ACP] is about rationing rather than sensible clinical judgement.*

*In young adult/transition work, huge fear among disabled communities and the perception*

*that they will be denied potentially effective interventions due to discrimination’. [Hospital*

*Palliative Care Team, Adult Service, Scotland]*

*‘Family and patient concerns around 'blanket' and CPR [cardiopulmonary resuscitation]*

*decisions’. [Hospital Palliative Care Team, Adult Service, England]*

Respondents reported that media coverage – regardless of its accuracy - on issues such as

blanket/generalised decisions, rationing of treatments, and the role (and limits of) ventilatory support,

exacerbated the aforementioned public fears and uncertainties:

*‘My views on advance care planning remain the same as pre-COVID; it should be*

*individualised to improve patient care. I have continued to practice in this way. The media*

*has covered how during the pandemic there have been some cases when the way it has been*

*delivered has led to those at the receiving end feeling as though their focus has been on*

*protecting services as opposed to the individual.’ [Multiple Settings, Adult Service, Scotland]*

## **Individual level**

### **Theme 2: Complex decision-making in the face of a new disease**

The rapid onset of a novel disease with so many uncertainties meant that decision-making during ACP

became even more complex and challenging. Uncertainties regarding the clinical trajectory and

prognosis of COVID patients contributed to the challenges of ACP because COVID seemed to affect

people in different ways; recovery, mortality, and outcomes varied between patients making it

difficult to use past experience to inform subsequent decisions. Moreover, profound uncertainties of a

different order existed that were related to knowing nothing about COVID-19 (e.g., its death/infection

rate, or whether it was acute/chronic, etc.):

Figure 1: An overview of the **themes** and *sub-themes* that represent the challenges to ACP in the context of COVID-19, and how they relate to the different levels of the Social Ecological Model.

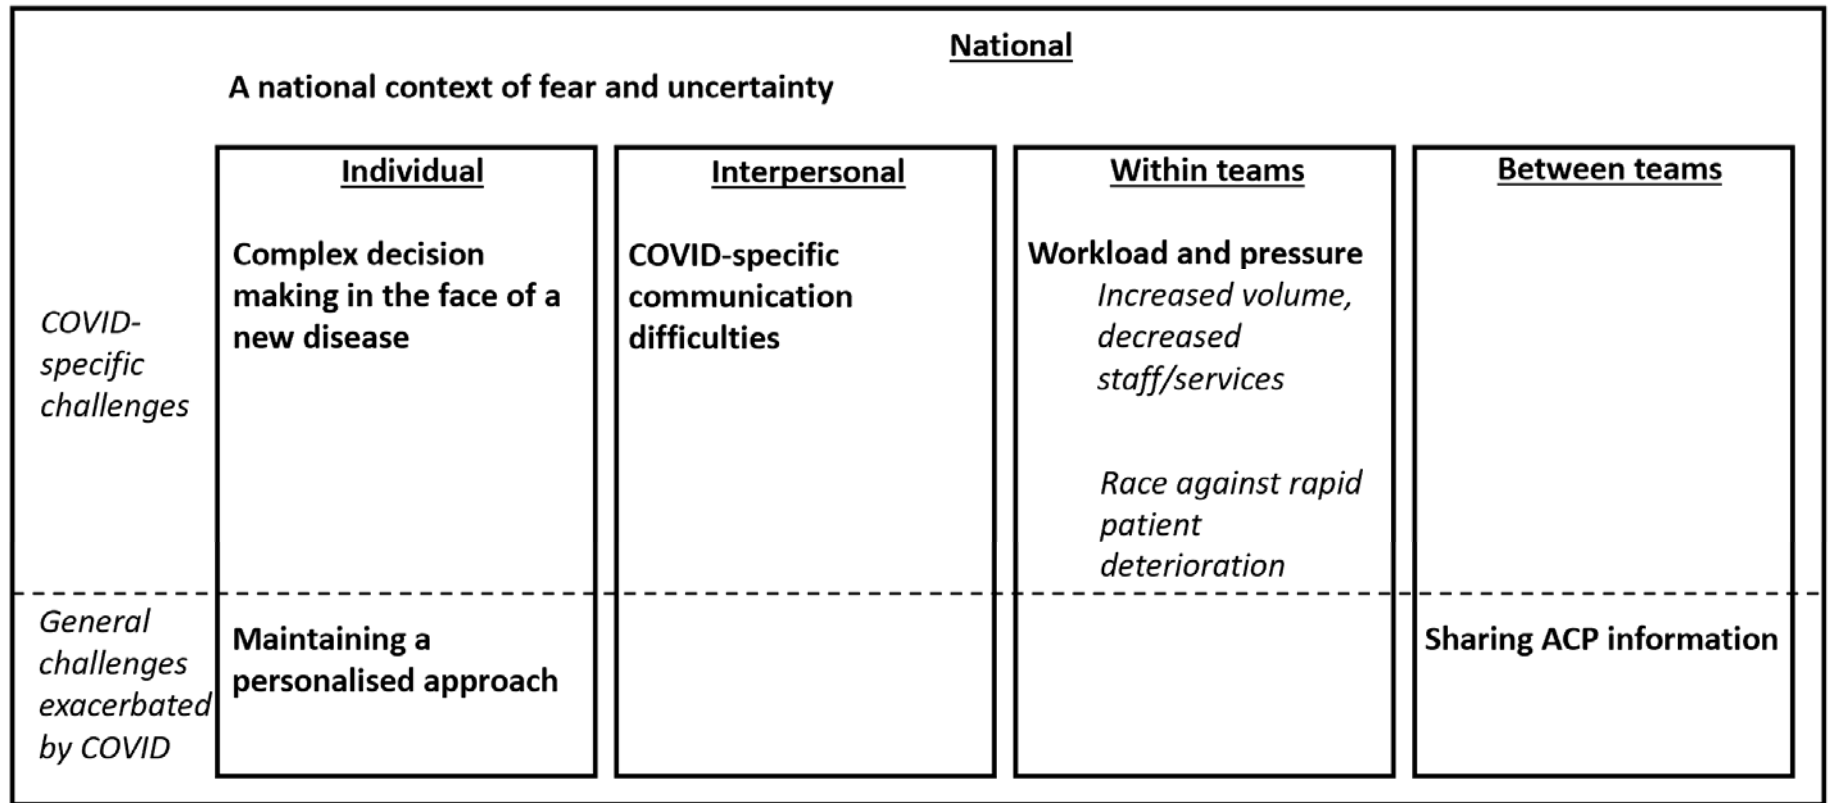

Note: This diagram is representative of findings related to section 1 only (the challenges to ACP)

*‘The uncertainty of response. Patients with advanced disease have survived while those with no underlying medical conditions have died. The ability to know the course of the illness, and make informed decisions with patients in light of that uncertainty, is challenging. It requires a dynamic approach to decision making which is difficult to sensitively achieve at times of high stress in medical systems.’* [Multiple Settings, Adult Service, England]

One aspect of decision making that was particularly complex and challenging was surrounding service provision and treatment options. This included discussing what services and treatments were appropriate/available, predicting how patients may respond to treatments, treatment limitations, and how any decisions on these issues were subject to dynamic changes in a person’s health status:

*‘Uncertainty about treatment availability, potential prognosis on an individual level, when to stop medical interventions like CPAP [meaning continuous positive airway pressure ventilation]/high flow oxygen’.* [Hospital Palliative Care Team, Adult Service, England]

*‘Some of the decisions about limitation of treatment may be appropriate while the patient has COVID but may not be if they recover and then experience different health conditions. I wonder if this review process is happening’.* [Hospital Palliative Care Team, Adult Service, England]

### **Theme 3: Maintaining a personalised approach**

Respondents reflected on how the abruptness of the pandemic made it difficult to avoid ACP becoming a ‘tick-box’ exercise in which generalised decisions were made:

*[One main challenge was reported as] ‘avoiding ACP becoming part of a tick box culture and remaining a meaningful conversation about what is important to a patient, ensuring the promotion of ACP is for the benefit of the patient and not motivated by limited resources.’*  
[Multiple settings, Adult Service, Scotland]

A prominent challenge to maintaining an individualised approach – particularly with regards to preferred place of care/death - was that ACP discussion were occurring in the context of limited choices regarding discharge options. This was either because some services refused to accept COVID

patients or because there was a reluctance in being discharged to settings where there were COVID positive patients and consequent visiting restrictions:

*‘Care options are different - not able to access care homes or the hospice as preferred place of care/death, especially in the first 5 weeks’.* [Home Palliative Care Team, Adult Service, Wales]

## **Interpersonal Level**

### **Theme 4: COVID-specific communication difficulties**

Policies on physical/social distancing and the use of personal protective equipment presented COVID-specific communication challenges. A common communication challenge reported was having remote and telephone ACP conversations. Lack of face-to-face contact meant that many healthcare professionals felt that they had lost some of the ‘tools’ that were integral to their practice during these exchanges:

*‘The reduced face-to-face contact and social distancing feels like we have had our tools taken away from us - emphasizing the importance of advanced communication skills - listening and responding appropriately, ensuring clear understandable language... The ward teams have needed to give bad news over telephone contact which is not usual practice - advance care planning over the telephone is markedly harder than it is face-to-face.’* [Hospital Palliative Care Team, Adult Service, England]

These lost ‘tools’ included the ability to draw on non-verbal clues (e.g., physical touch, reading the environment/patient cues), and develop trusting/respectful relationships prior to conversations; things deemed fundamental in managing the sensitivities, compassion, and nuances of ACP conversations:

*‘Not being able to have face-to-face discussions when having sensitive conversations, not being able to physically touch patients and their loved ones who may crave physical comfort such as a hug or hand being held.’* [Multiple Settings, Adult Service, England]

*‘Staff finding it difficult to have those conversations with people who they haven’t met before and having to do it remotely feels impersonal and harsh.’* [Multiple Settings, Adult Service,

England]

Even if face-to-face discussions were possible, personal protective equipment acted as a physical barrier which made it difficult to use non-verbal communication to display compassion/empathy or provide physical forms of comfort:

*‘Personal protective equipment has been a challenge as difficult to see facial expressions or comfort a family member during difficult distressing discussions.’* [Multiple Settings, Adult and Children Services, England]

Regardless of whether discussions were remote or face-to-face, an overarching challenge to communicating ACPs during the pandemic was the difficulty of involving families in conversations.

*‘The restrictions on visiting make it more difficult to involve families and often the family haven't seen the patient for some time and don't have that visual cue of how unwell they are.’* [Hospital Palliative Care Team, Adult Service, England]

There were concerns that people from ethnic minority backgrounds may have been disproportionately affected by these communication difficulties:

*‘it is much harder in those patients / families that you haven't seen face to face, and particularly when there are cultural or language barriers or capacity issues preventing a conversation with the patient.’* [Specialist Palliative Home Care Service, Adult Service, England]

## **Within teams and services level**

### **Theme 5: Workload and pressure**

#### *Sub-theme 1: Increased volume, decreased staff and services*

The increase in the number of patients who needed ACP discussions (for new referrals and reviewing patients already on their caseload) meant that teams had to work longer, harder, and quicker to ensure that timely ACP discussions occurred:

*‘Volume of people who need them.’* [Multiple Settings, Adult Services, England]

*'The numbers involved, particularly [in the] care home sector.'* [Multiple Settings, Adult Service, Northern Ireland]

Exacerbating this was a decrease in the availability of staff (due to absence, deployment to other services, and understaffing):

*'Staff availability for distribution. Reaching all required professionals, some of the other professionals are working differently so may not be as available, also potential increase in staff absence may present a challenge.'* [Multiple Settings, Children Service, England]

*'More difficult to conduct as not seeing patients earlier in their prognosis as no day care facilities.'* [Multiple Settings, Adult Service, England]

#### *Sub-theme 2: A race against rapid patient deterioration*

Compounding an increased workload and pressure was the rapid clinical deterioration of COVID patients which resulted in a perpetual race against time to engage in discussions before they became too ill, lost capacity, or died:

*'There wasn't time for advance care planning with patients with COVID - prognosis was sudden and very short.'* [Hospital Palliative Care Team, Adult Service, England]

*'The hospital palliative care team have had an increase in referrals of very unwell semiconscious/unconscious with severe respiratory failure and high O2 requirements who are imminently dying and too unwell to engage in advance care planning. (Most would be too unwell for transfer even if they wanted this). There has been a decrease in less unwell cancer/and non-COVID, non-cancer referrals where advance care planning may be more possible.'* [Hospital Palliative Care Team, Adult Service, England]

Because of this, many respondents spoke about how ACP conversations felt rushed and forced, rather than spending the necessary time needed to adopt a holistic and person-centered approach to discussions:

*‘ACP was needed to be done quickly and it wasn't always done at the right time, right place by the right person.’ [Hospital Palliative Care Team, Adult Service, Scotland]*

## **Between teams and services level**

### **Theme 6: Sharing ACP information**

A pre-existing challenge exacerbated by COVID was the sharing of ACP information between services. Different services often used different electronic systems that did not allow for seamless transfer of patient ACP information:

*‘The ability to share information between primary and secondary care, out-of-hours services and a mixture of [Local Authority] and privately owned care homes.’ [Multiple Settings, Adult Service, Wales]*

## **Section 2: Changes to support ACP**

This section presents two themes and five sub-themes representing the changes that services made to support ACP during the pandemic.

### **Theme 1: Adapting local processes**

#### *Sub-theme 1: Prioritisation of escalation planning and DNACPR conversations*

One adaptation was to prioritise certain components of ACP (such as treatment escalation plans, Do Not Attempt Cardio-pulmonary Resuscitation, Recommended Summary Plan for Emergency Care and Treatment forms) felt to be of particular importance during the pandemic:

*‘Frailty nurses have been involved in ensuring that [many] residents in residential care in [locality] have an ACP & treatment escalation plan. Historically ACP for patients known to hospice is high. However, we are ensuring that all patients on IPU & community [register] have treatment escalation plans.’ [Multiple Settings, Adult Service, England]*

#### *Sub-theme 2: Normalisation and integration of ACP*



Another adaptation to local processes was an explicit effort made by services to integrate and embed ACP discussions into everyday clinical practice. This meant proactively initiating, reviewing, and updating ACPs for all COVID and non-COVID patients, alongside ensuring that ACP discussions were routinely reviewed in multidisciplinary team meetings:

*‘Actively reviewing the outpatient caseload and community caseloads and targeting people without an ACP and broaching this with them more robustly.’* [Multiple Settings, Adult Service, England]

Respondents reflected on the pragmatic and practical steps taken, including having conversations earlier and integrating discussions as a routine practice that was completed on patient referral, admission, and discharge:

*‘Routinely including option of ACP for all new referrals. Completing treatment escalation planning forms for patients in the community and on discharge from the hospice.’* [Multiple Settings, Adult Service, England]

## **Theme 2: Adapting local structures**

### *Sub-theme 3: Using technology to support ACP*

One structural change that was made to support ACP discussions was the use of technology. Despite the challenges reported on having virtual and telephone ACP discussions, many respondents reflected on how using these technologies as a form of communication was a way in which they adapted to the pandemic:

*‘Doing more ACP over the telephone which staff have had to adapt to doing. Patients are understanding the need of social distancing and the impact of COVID - 19.’* [Multiple Settings, Adult Service, England]

Services also used technology to support ACP by refining information technology systems.

Predominantly, this included the implementation and documenting of ACP on patients’ electronic record and/or adapting electronic forms so that they were COVID-specific:

*'We have had ACP discussions on the phone and via video consultations, we have completed 'paper' ACP documents electronically.'* [Home Palliative Care Team, Adult Service, England]

*'[Name of system] was used where possible which was a new electronic way of recording ACP discussions that had just been finalised for use.'* [Hospital Palliative Care Team, Adult Service, Scotland]

#### *Sub-theme 4: Shifting resources*

Some respondents reported shifting resources between services as a means to adapt to COVID-19, including increased ACP demands. This was usually through delegating certain staff members with the specific responsibility of taking an active role in supporting ACP discussions:

*'Clinical nurse specialist team taking on a much more active role in supporting these conversations.'* [Multiple Settings, Adult Service, England]

*'Much work from the day hospice team supporting people who have had a GP letter about DNACPR and wish to discuss it further.'* [Inpatient Palliative Care Unit, Adult Service, England]

#### *Sub-theme 5: Adapting fast through collaboration*

A common change that services made to support ACP during COVID was establishing new, or developing already-existing, networks of support and integrated working within and between teams and services. A heavy emphasis was reported on using these networks to adapt fast through collaboration, usually by drawing on the knowledge and skills of specialists in palliative care who were experienced in ACP. The networks formed and types of collaboration that occurred were considerable. An overview of these collaborative changes with quotes can be seen in Figure 2.

Figure 2: An overview (with example quotes) of the collaboration networks that were established and developed during COVID-19 and how these were used to support ACP

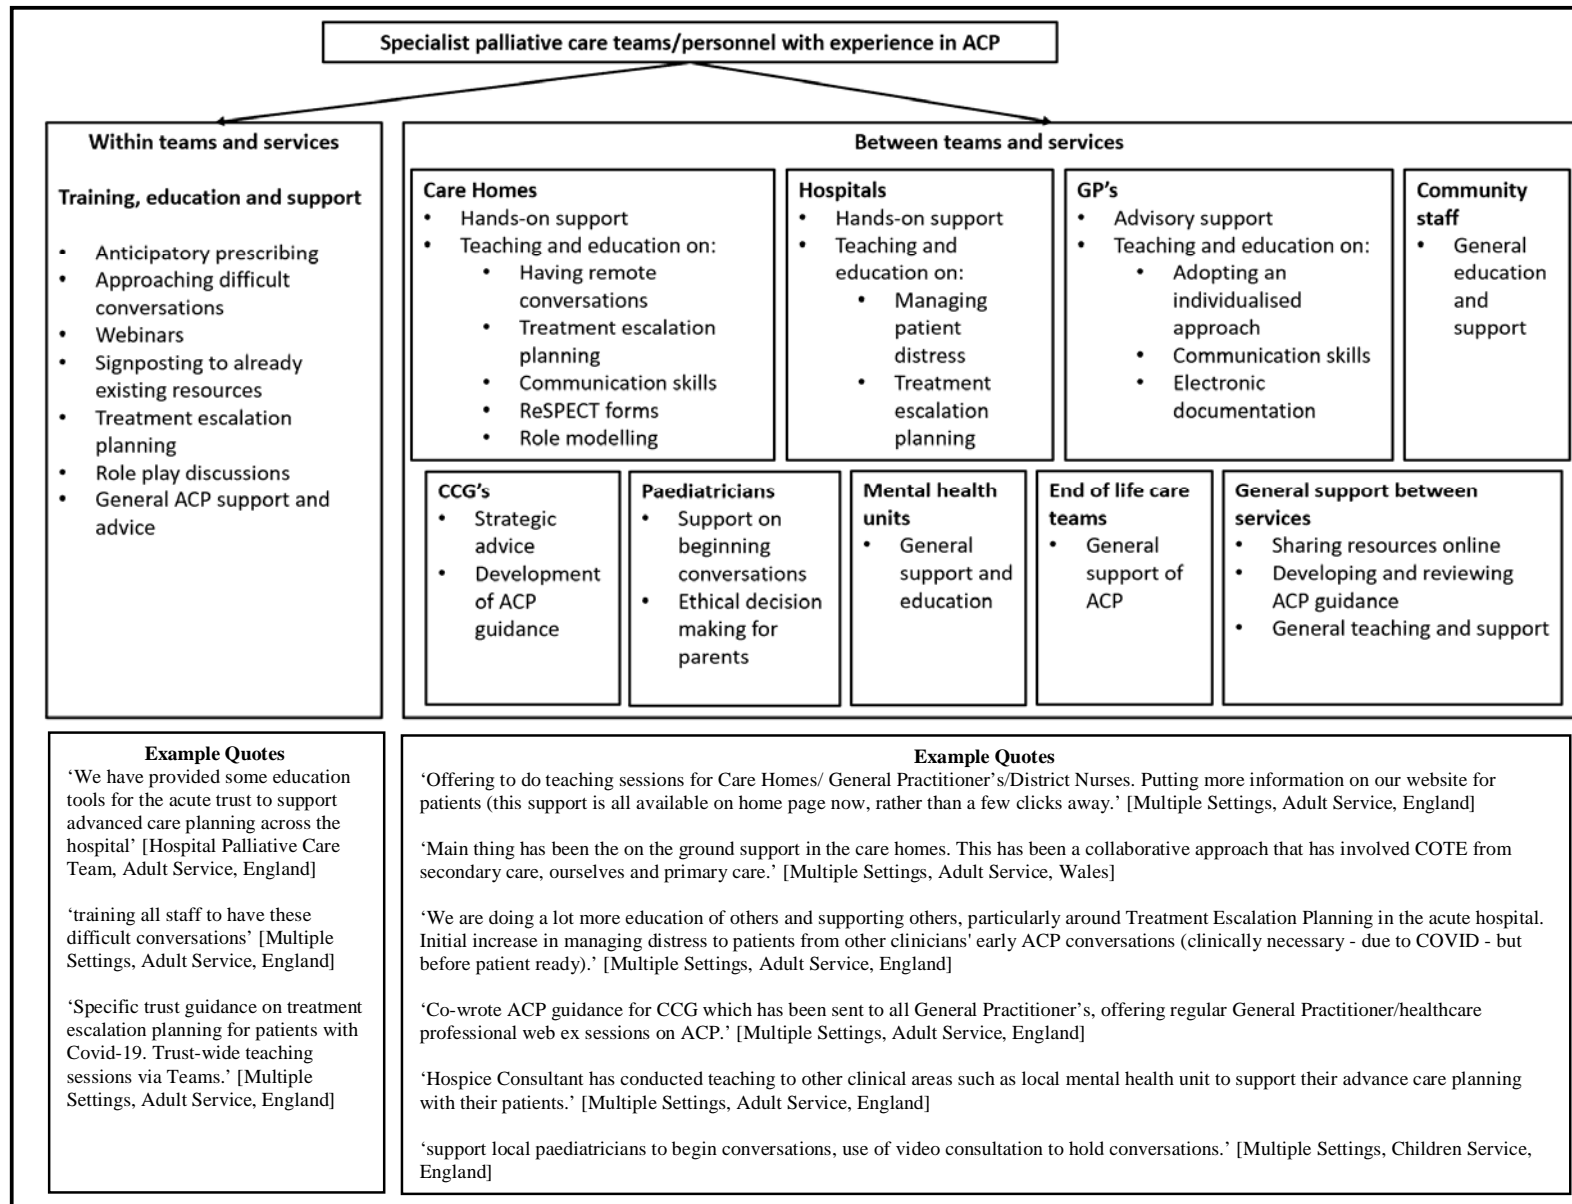

## Discussion

Using the Social Ecological Model, our findings demonstrate how the COVID-19 pandemic exacerbated already-existing challenges to conducting high-quality and timely ACP. At the individual level, the main challenge was maintaining an individualised approach<sup>(13)</sup> and making complex decisions in the face of extreme clinical uncertainty<sup>(13, 14, 28)</sup>. At the within- and between-teams level, racing against rapid deterioration<sup>(29-31)</sup> and sharing of ACP-related information<sup>(13, 32)</sup> were reported as challenging. Though clinical uncertainty about COVID-19 had similarities to other critical illnesses,<sup>(32)</sup> the depth of uncertainty in a disease of which almost nothing was known was of a different order in this pandemic, bringing unique challenges to ACP.

This study shows how COVID-specific challenges made delivering high quality ACP difficult. These occurred at individual (limiting choices of place of care/death), interpersonal (COVID-specific communication difficulties), within-teams (a rapid increase in the volume of ACPs combined with sudden decrease in staff/services) and national (delivering ACP in a national context of fear and uncertainty) levels. The Social Ecological Model illuminated how a national context of fear provided a contextual backdrop through which the various challenges are better understood. These worries may be viewed through the ‘four horsemen of fear’ concept<sup>(33)</sup> in which COVID-19 precipitated bodily, interpersonal, cognitive, and behavioural fears. These fears were brought into ACP conversations by patients, and their families, and health professionals, disrupting their ability to engage in ACP conversations as effectively as they would have liked.

In adapting to these challenges, services made changes to structures and processes of care. There is already evidence of the benefits of some of these, such as having earlier ACP discussions<sup>(13, 34)</sup> and training aimed at facilitating healthcare professionals’ skills/confidence in communicating ACPs.<sup>(35-37)</sup> Recent work has also demonstrated the feasibility and effectiveness of having virtual discussions with patients/families during COVID-19,<sup>(38, 39)</sup> and resources have been developed to support healthcare professionals to navigate the challenges and sensitivities of virtual difficult conversations.<sup>(40-42)</sup>

However, some changes induced by the pandemic, such as reducing ACP to specific components were less helpful. This is because ACP is a multi-component process, not a one-time event/document, not least because preferences and priorities may change.<sup>(6-8, 10, 12, 34, 43-46)</sup> Delivering *all* of the multiple components of ACP, and delivering them well, is important to ensure inclusive, holistic, and individualised care that focuses on what matters most to patients.<sup>(47)</sup> Whilst understandable in the pandemic context, emphasis on discrete components of ACP may jeopardise the individualised and holistic qualities essential for the delivery of high quality and comprehensive ACP, and runs the risk of making ACP a ‘tick box exercise focused on a predetermined list of preferences’.<sup>(43)</sup> This is a concern raised by the public and clinical communities.<sup>(43, 48, 49)</sup>

### *Considerations for clinical practice and policy*

COVID-19 has provided an opportunity to re-think ACP in which the starting point to any discussion is always the values and priorities of patients themselves. Initially, these discussions are likely to be broad in nature, with their focus then narrowing in line with the more immediate concerns of individuals.<sup>(47)</sup>

Some changes to support ACP were temporary and may be dropped post-pandemic (such as shifting of resources and focusing on specific components of ACP), but innovative changes that showed promise may be amplified and sustained. Changes such as learning fast through collaboration, training to support ACP, the integration of ACP into everyday clinical practice, and use of virtual technology are important to maintain as the need for palliative care is estimated to rise considerably<sup>(18)</sup> and need for ACP will not be met by specialists alone.<sup>(50-52)</sup> In facilitating these changes, Table 4 provides questions for health professionals and policymakers – in the UK and beyond - to consider when conducting ACP during a pandemic and in clinical practice more generally. Most importantly, policymakers in any given country need to consider how high-quality ACP can be resourced as a part of standard care.

### *Strengths, limitations, and future research*

This survey received a high number of respondents from all palliative care settings: Hospice UK report approximately 200 hospice services across the UK; 168 (~ 84%) responded to this survey.<sup>(53)</sup>

The timely delivery of the survey enabled capture of changes across the peak of the first wave of COVID-19 in the UK.

ACP is influenced and moderated by contextual and cultural-dependant factors.<sup>(54, 55)</sup> Whilst many of the findings of this paper may be applicable in these contexts, more research that explores international and cultural differences regarding ACP during COVID-19 is needed. Survey data was collected at a single time-point and so the processes through which challenges to ACP changed over time, and the longer-term impact, sustainability, and effectiveness of changes are not always clear.

### **Conclusion**

Many challenges to providing high quality ACP during COVID-19 pre-dated the pandemic, whilst others were COVID-19 specific, or markedly exacerbated by the pandemic. Professionals and healthcare providers need to ensure ACP is well-founded for individuals, and genuinely tailored to their values and priorities, and attuned to their ethnic, cultural and religious context. Policymakers for health and social care need to consider carefully how high-quality ACP can be resourced and normalised as a part of standard health-care ahead of future pandemic waves.

Table 4: Multi-level considerations for conducting high-quality ACP during a pandemic and clinical practice more generally

| Level                | Who                                    | Questions to consider                                                                                                                                                                                                                                                                                                                                                                                                                                                                                                                                                                                                                                                                                                    |
|----------------------|----------------------------------------|--------------------------------------------------------------------------------------------------------------------------------------------------------------------------------------------------------------------------------------------------------------------------------------------------------------------------------------------------------------------------------------------------------------------------------------------------------------------------------------------------------------------------------------------------------------------------------------------------------------------------------------------------------------------------------------------------------------------------|
| <b>Individual</b>    | <i>Healthcare professionals</i>        | <ul style="list-style-type: none"> <li>• Is the starting point for ACP discussions based on the values and priorities of patients themselves and their care network?</li> <li>• Is ACP being treated as a multi-component process that considers: <ul style="list-style-type: none"> <li>▪ Identifying values/priorities based on past experiences and quality of life?</li> <li>▪ Choosing proxy decision-makers and verifying that they understand their role?</li> <li>▪ Informing family and friends of wishes in advance to reduce/prevent conflict?</li> </ul> </li> <li>• Is ACP considering both improvement and deterioration in illness (parallel planning) to encompass the genuine uncertainties?</li> </ul> |
| <b>Interpersonal</b> | <i>Service providers/organisations</i> | <ul style="list-style-type: none"> <li>• Do you have systems and protocols in place that supports ACP discussions taking place through various means, including: <ul style="list-style-type: none"> <li>▪ Face-to-face with personal protective equipment (if appropriate)?</li> <li>▪ Virtually/telephone?</li> </ul> </li> <li>• Have you considered distributing ACP information in the most commonly non-English speaking language for your area?</li> </ul>                                                                                                                                                                                                                                                         |
| <b>Within-team</b>   |                                        | <ul style="list-style-type: none"> <li>• Has your organisation embedded ACP into key points of everyday practice, including: <ul style="list-style-type: none"> <li>▪ At referral/admission?</li> <li>▪ Within multi-disciplinary team meetings?</li> <li>▪ At discharge?</li> </ul> </li> <li>• Have staff (specialist and non-specialist) been provided with adequate training, education, and support on the importance of, and best ways to conduct ACP (including with ethnic, cultural and religious groups relevant for your area)?</li> </ul>                                                                                                                                                                    |
| <b>Between-team</b>  |                                        | <ul style="list-style-type: none"> <li>• Are you part of a collaborative network in which support for and integrated working within and between teams and services is used to facilitate ACP?</li> </ul>                                                                                                                                                                                                                                                                                                                                                                                                                                                                                                                 |

|                 |                                                       |                                                                                                                                                                                                                         |
|-----------------|-------------------------------------------------------|-------------------------------------------------------------------------------------------------------------------------------------------------------------------------------------------------------------------------|
| <b>National</b> | <i>Policy makers; service providers/organisations</i> | <ul style="list-style-type: none"> <li>In line with the above, have you considered how high-quality ACP can be resourced and normalised as a part of standard care across the health and social care sector?</li> </ul> |
|-----------------|-------------------------------------------------------|-------------------------------------------------------------------------------------------------------------------------------------------------------------------------------------------------------------------------|

---



## **Author Contributions**

IJH is the grant holder and chief investigator; KES, MM, FEM, CW, NP, LKF, SB, MBH and AO are co-applicants for funding. IJH and CW, with critical input from all authors, wrote the protocol for the CovPall study. MBH, AO, and RC co-ordinated data collection and liaised with centres, with input from IJH. AB, FEM, and LKF analysed the data. All authors had access to all study data, discussed the interpretation of findings and take responsibility for data integrity and analysis. AB, FEM, and LKF drafted the manuscript. All authors contributed to the analysis plan and provided critical revision of the manuscript for important intellectual content. IJH is the guarantor. Sites who contributed to this work can be found in supplementary file 3.

## **The CovPall study group**

CovPall Study Team: Professor Irene J Higginson (Chief Investigator), Dr Sabrina Bajwah (Co-I), Dr Matthew Maddocks (Co-I), Professor Fliss Murtagh (Co-I), Professor Nancy Preston (Co-I), Dr Katherine E Sleeman (Co-I), Professor Catherine Walshe (Co-I), Professor Lorna K Fraser (Co-I), Dr Mevhibe B Hocaoglu (Co-I), Dr Adejoke Oluyase (Co-I), Dr Andrew Bradshaw, Lesley Dunleavy and Rachel L Cripps.

CovPall Study Partners: Hospice UK, Marie Curie, Sue Ryder, Palliative Outcome Scale Team, European Association of Palliative Care (EAPC), Together for Short Lives and Scottish Partnership for Palliative Care.

## **Acknowledgments**

This study was part of CovPall, a multi-national study, supported by the Medical Research Council, National Institute for Health Research Applied Research Collaboration South London and Cicely Saunders International. We thank all collaborators and advisors. We thank all participants, partners, PPI members and our Study Steering Group. We gratefully acknowledge technical assistance from the Precision Health Informatics Data Lab group (<https://phidatalab.org>) at National Institute for Health Research (NIHR) Biomedical Research Centre at South London and Maudsley NHS Foundation Trust and King's College London for the use of REDCap for data capture.

## **Funding**

This research was supported by Medical Research Council grant number MR/V012908/1. Additional support was from the National Institute for Health Research (NIHR), Applied Research Collaboration, South London, hosted at King's College Hospital NHS Foundation Trust, and Cicely Saunders International (Registered Charity No. 1087195).

IJH is a National Institute for Health Research (NIHR) Emeritus Senior Investigator and is supported by the NIHR Applied Research Collaboration (ARC) South London (SL) at King's College Hospital National Health Service Foundation Trust. IJH leads the Palliative and End of Life Care theme of the NIHR ARC SL and co-leads the national theme in this. MM is funded by a National Institute for Health Research (NIHR) Career Development Fellowship (CDF-2017-10-009) and NIHR ARC SL. LF is funded by a NIHR Career Development Fellowship (award CDF-2018-11-ST2-002). KS is funded by a NIHR Clinician Scientist Fellowship (CS-2015-15-005). RC is funded by Cicely Saunders International. FEM is a NIHR Senior Investigator. MBH is supported by the NIHR ARC SL. The views expressed in this article are those of the authors and not necessarily those of the NIHR, or the Department of Health and Social Care.

## **Conflicts of Interest**

None of the authors have any conflicts of interest to declare

## **CovPall Data Sharing Statement**

Applications for use of the survey data can be made for up to 10 years, and will be considered on a case by case basis on receipt of a methodological sound proposal to achieve aims in line with the original protocol. The study protocol is available on request. All requests for data access should be addressed to the Chief Investigator via the details on the CovPall website (<https://www.kcl.ac.uk/cicelysaunders/research/evaluating/covpall-study>, and [palliativecare@kcl.ac.uk](mailto:palliativecare@kcl.ac.uk)) and will be reviewed by the Study Steering Group.

## ORCID ID

Sabrina Bajwah <https://orcid.org/0000-0001-5338-8107>

Andrew Bradshaw <https://orcid.org/0000-0003-1717-1546>

Rachel Cripps <https://orcid.org/0000-0001-6945-5028>

Lesley Dunleavy <https://orcid.org/0000-0002-5924-8145>

Lorna Fraser <https://orcid.org/0000-0002-1360-4191>

Irene J Higginson <https://orcid.org/0000-0002-3687-1313>

Mevhibe Hocaoglu <https://orcid.org/0000-0003-1417-7117>

Matthew Maddocks <https://orcid.org/0000-0002-0189-0952>

Fliss Murtagh <https://orcid.org/0000-0003-1289-3726>

Adejoke Oluyase <https://orcid.org/0000-0002-1506-7262>

Nancy Preston <https://orcid.org/0000-0003-2659-2342>

Katherine Sleeman <https://orcid.org/0000-0002-9777-4373>

Catherine Walshe <https://orcid.org/0000-0002-4531-8608>

## References

1. Adams JG, Walls RM. Supporting the health care workforce during the COVID-19 global epidemic. *Jama*. 2020;323(15):1439-40.
2. Ferguson L, Barham D. Palliative Care Pandemic Pack: a Specialist Palliative Care Service response to planning the COVID-19 pandemic. *Journal of Pain and Symptom Management*. 2020.
3. World Health Organisation. WHO Coronavirus Disease (COVID-19) Dashboard 2020 [Available from: <https://covid19.who.int/>].
4. Nouvet E, Sivaram M, Bezanson K, Krishnaraj G, Hunt M, de Laat S, et al. Palliative care in humanitarian crises: a review of the literature. *Journal of International Humanitarian Action*. 2018;3(1):5.
5. Etkind SN, Bone AE, Lovell N, Cripps RL, Harding R, Higginson IJ, et al. The role and response of palliative care and hospice services in epidemics and pandemics: a rapid review to inform practice during the COVID-19 pandemic. *Journal of Pain and Symptom Management*. 2020; 60(1):e31-e40.
6. Rietjens JA, Sudore RL, Connolly M, van Delden JJ, Drickamer MA, Droger M, et al. Definition and recommendations for advance care planning: an international consensus supported by the European Association for Palliative Care. *The Lancet Oncology*. 2017;18(9):e543-e51.
7. McMahan RD, Knight SJ, Fried TR, Sudore RL. Advance care planning beyond advance directives: perspectives from patients and surrogates. *Journal of pain and symptom management*. 2013;46(3):355-65.
8. Gomes B, Calanzani N, Curiale V, McCrone P, Higginson IJ. Effectiveness and cost-effectiveness of home palliative care services for adults with advanced illness and their caregivers. *Cochrane Database of Systematic Reviews*. 2013(6): CD007760.
9. Etkind SN, Lovell N, Nicholson CJ, Higginson IJ, Murtagh FEM. Finding a 'new normal' following acute illness: A qualitative study of influences on frail older people's care preferences. *Palliative Medicine*. 2019;33(3).
10. Lin CP, Evans CJ, Koffman J, Armes J, Murtagh FEM, Harding R. The conceptual models and mechanisms of action that underpin advance care planning for cancer patients: A systematic review of randomised controlled trials. *Palliat Med*. 2019;33(1):5-23.
11. Curtis JR, Kross EK, Stapleton RD. The importance of addressing advance care planning and decisions about do-not-resuscitate orders during novel coronavirus 2019 (COVID-19). *Jama*. 2020; 323(18):1771-1772.
12. You JJ, Dodek P, Lamontagne F, Downar J, Sinuff T, Jiang X, et al. What really matters in end-of-life discussions? Perspectives of patients in hospital with serious illness and their families. *Cmaj*. 2014;186(18):E679-E87.
13. Bernacki RE, Block SD. Communication about serious illness care goals: a review and synthesis of best practices. *JAMA internal medicine*. 2014;174(12):1994-2003.
14. Jabbarian LJ, Zwakman M, van der Heide A, Kars MC, Janssen DJ, Van Delden JJ, et al. Advance care planning for patients with chronic respiratory diseases: a systematic review of preferences and practices. *Thorax*. 2018;73(3):222-30.
15. De Vleminck A, Houttekier D, Pardon K, Deschepper R, Van Audenhove C, Vander Stichele R, et al. Barriers and facilitators for general practitioners to engage in advance care planning: a systematic review. *Scandinavian journal of primary health care*. 2013;31(4):215-26.
16. Rietjens J, Korfage I, Taubert M. Advance care planning: the future. *BMJ Supportive & Palliative Care*. 2020;0:1-3.
17. Costantini M, Sleeman KE, Peruselli C, Higginson IJ. Response and role of palliative care during the COVID-19 pandemic: a national telephone survey of hospices in Italy. *Palliative medicine*. 2020;34(7):889-895.
18. Etkind S, Bone A, Gomes B, Lovell N, Evans C, Higginson I, et al. How many people will need palliative care in 2040? Past trends, future projections and implications for services. *BMC medicine*. 2017;15(1):1-10.
19. von Elm E, Altman DG, Egger M, Pocock SJ, Gøtzsche PC, Vandenbroucke JP, et al. The Strengthening of Reporting of Observational Studies in Epidemiology (STROBE) statement: guidelines for reporting observational studies. *Lancet*. 2007;370(9596):1453-7.

20. Eysenbach G. Improving the quality of Web surveys: the Checklist for Reporting Results of Internet E-Surveys (CHERRIES). *J Med Internet Res*. 2004;6(3):e34.
21. Ritchie J, Lewis J, Nicholls CM, Ormston R. *Qualitative research practice: A guide for social science students and researchers*. Los Angeles, LA: SAGE, 2013.
22. Sallis JF, Owen N, Fisher EB. Ecological models of health behaviour. In: Glanz K, Rimer BK, Viswanath K, editors. *Health behaviour and health education: Theory, research, and practice*. San Francisco, CA: John Wiley & Sons; 2008. p. 465-82.
23. McLeroy KR, Bibeau D, Steckler A, Glanz K. An ecological perspective on health promotion programs. *Health education quarterly*. 1988;15(4):351-77.
24. Sparkes AC, Smith B. Judging the quality of qualitative inquiry: Criteriology and relativism in action. *Psychology of sport and exercise*. 2009;10(5):491-7.
25. Smith B, Caddick N. Qualitative methods in sport: A concise overview for guiding social scientific sport research. *Asia Pacific journal of sport and social science*. 2012;1(1):60-73.
26. Tracy SJ. Qualitative quality: Eight “big-tent” criteria for excellent qualitative research. *Qualitative inquiry*. 2010;16(10):837-51.
27. Phoenix C, Orr N. Analysing exceptions within qualitative data: promoting analytical diversity to advance knowledge of ageing and physical activity. *Qualitative Research in Sport, Exercise and Health*. 2017;9(3):271-84.
28. Koffman J, Gross J, Etkind SN, Selman LE. Clinical uncertainty and Covid-19: Embrace the questions and find solutions. *Palliative Medicine*. 2020;34(7):829-831.
29. You JJ, Downar J, Fowler RA, Lamontagne F, Ma IW, Jayaraman D, et al. Barriers to goals of care discussions with seriously ill hospitalized patients and their families: a multicenter survey of clinicians. *JAMA internal medicine*. 2015;175(4):549-56.
30. Zaros MC, Curtis JR, Silveira MJ, Elmore JG. Opportunity lost: End-of-life discussions in cancer patients who die in the hospital. *Journal of hospital medicine*. 2013;8(6):334-40.
31. Ting R, Edmonds P, Higginson IJ, Sleeman KE. Palliative care for patients with severe covid-19. *BMJ*. 2020;370:m2710.
32. Wilson CJ, Newman J, Tapper S, Lai S, Cheng PH, Wu FM, et al. Multiple locations of advance care planning documentation in an electronic health record: are they easy to find? *Journal of palliative medicine*. 2013;16(9):1089-94.
33. Schimmenti A, Billieux J, Starcevic V. The four horsemen of fear: An integrated model of understanding fear experiences during the COVID-19 pandemic. *Clinical Neuropsychiatry: Journal of Treatment Evaluation*. 2020;17(2):41-5.
34. Brighton LJ, Bristowe K. Communication in palliative care: talking about the end of life, before the end of life. *Postgraduate medical journal*. 2016;92(1090):466-70.
35. Allen SL, Davis KS, Rousseau PC, Iverson PJ, Mauldin PD, Moran WP. Advanced care directives: overcoming the obstacles. *Journal of graduate medical education*. 2015;7(1):91-4.
36. Szmuiłowicz E, El-Jawahri A, Chiappetta L, Kamdar M, Block S. Improving residents' end-of-life communication skills with a short retreat: a randomized controlled trial. *Journal of palliative medicine*. 2010;13(4):439-52.
37. Liénard A, Merckaert I, Libert Y, Bragard I, Delvaux N, Etienne A-M, et al. Transfer of communication skills to the workplace during clinical rounds: impact of a program for residents. *PloS one*. 2010;5(8):e12426.
38. Kuntz JG, Kavalieratos D, Esper GJ, Ogbu Jr N, Mitchell J, Ellis CM. Feasibility and Acceptability of Inpatient Palliative Care E-Family Meetings During COVID-19 Pandemic. *Journal of Pain and Symptom Management*. 2020;60(3):e28-e32.
39. Sutherland AE, Stickland J, Wee B. Can video consultations replace face-to-face interviews? Palliative medicine and the Covid-19 pandemic: rapid review. *BMJ Supportive & Palliative Care*. 2020;10(3):271-275.
40. Thomas Jd, Leiter RE, Abrahm JL, Shameklis JC, Kiser SB, Gelfand SL, et al. Development of a Palliative Care Toolkit for the COVID-19 Pandemic. *Journal of Pain and Symptom Management*. 2020;60(2):e22-e25.
41. Gibbon LM, GrayBuck KE, Buck LI, Huang K-N, Penumathy NL, Wu S, et al. Development and implementation of a clinician-facing prognostic communication tool for patients with COVID-19 and critical illness. *Journal of Pain and Symptom Management*. 2020;60(2):e1-e6.

42. Schwarze ML, Zelenski A, Baggett ND, Kalbfell E, Ljuman F, Silverman E, et al. Best Case/Worst Case: ICU (COVID-19)—A Tool to Communicate with Families of Critically Ill Patients with COVID-19. *Palliative Medicine Reports*. 2020;1(1):3-4.
43. Hopkins SA, Lovick R, Polak L, Bowers B, Morgan T, Kelly MP, et al. Reassessing advance care planning in the light of covid-19. *British Medical Journal*. 2020;369:m1927.
44. Gómez-Vírveda C, de Maeseneer Y, Gastmans C. Relational autonomy: what does it mean and how is it used in end-of-life care? A systematic review of argument-based ethics literature. *BMC medical ethics*. 2019;20(1):76.
45. Martin DK, Emanuel LL, Singer PA. Planning for the end of life. *The Lancet*. 2000;356(9242):1672-6.
46. Etkind SN, Lovell N, Nicholson CJ, Higginson IJ, Murtagh FEM. Finding a ‘new normal’ following acute illness: A qualitative study of influences on frail older people’s care preferences. *Palliative Medicine*;33(3):301-311
47. Abel J, Kellehear A, Millington Sanders C, Taubert M, Kingston H. Advance care planning re-imagined: a needed shift for COVID times and beyond. *Palliative Care and Social Practice*. 2020;14:1-8.
48. Iacobucci G. Covid-19: Don’t apply advance care plans to groups of people, doctors’ leaders warn. *British Medical Journal*. 2020;369:m1419.
49. Johnson H, Brighton LJ, Clark J, Roberts H, Pocock L, Ogden M, et al. Experiences, concerns, and priorities for palliative care research during the COVID-19 pandemic. A rapid virtual stakeholder consultation with people affected by serious illness in England. London: King's College London; 2020.
50. World Health Organisation. Palliative care: the solid facts Geneva: World Health Organisation 2004.
51. Quill TE, Abernethy AP. Generalist plus specialist palliative care—creating a more sustainable model. *New England Journal of Medicine*. 2013;368(13):1173-5.
52. Davies A, Hayes J. Palliative care in the context of a pandemic: similar but different. *Clinical Medicine*. 2020;20(3):274-277.
53. Hospice UK. Facts and figures about hospice care 2020 [Available from: <https://www.hospiceuk.org/about-hospice-care/media-centre/facts-and-figures>].
54. Lin CP, Evans CJ, Koffman J, Chen PJ, Hou MF, Harding R. Feasibility and acceptability of a culturally adapted advance care planning intervention for people living with advanced cancer and their families: A mixed methods study. *Palliat Med*. 2020;34(5):651-66.
55. Cheng SY, Lin CP, Chan HY, Martina D, Mori M, Kim SH, et al. Advance care planning in Asian culture. *Jpn J Clin Oncol*. 2020;50(9):976-89.
